# Supplementary material for: Thermometric and optical heating bi-functional properties of upconversion phosphor Ba5Gd8Zn4O21:Yb3+/Tm3+
Source: Royal Society of Chemistry journal article supplement (doi:10.1039/c5tc01054c), 2015-01-01
Supplement: c5tc01054c1.pdf [file c5tc01054c1.pdf]

### Supporting Materials:

Table S1 The lattice constants of  $\text{Ba}_5\text{Gd}_8\text{Zn}_4\text{O}_{21}$  with different dopant contents.

|                                           | $a/b$ (Å) | $c$ (Å) | volume (Å <sup>3</sup> ) |
|-------------------------------------------|-----------|---------|--------------------------|
| JCPDS 51-1686                             | 13.919    | 5.768   | 1117.484                 |
| 0.3%Tm <sup>3+</sup>                      | 13.911    | 5.765   | 1115.619                 |
| 0.3%Tm <sup>3+</sup> /10%Yb <sup>3+</sup> | 13.946    | 5.707   | 1109.959                 |
| 0.5%Tm <sup>3+</sup> /10%Yb <sup>3+</sup> | 13.937    | 5.690   | 1105.225                 |
| 1%Tm <sup>3+</sup> /10%Yb <sup>3+</sup>   | 13.935    | 5.665   | 1100.054                 |

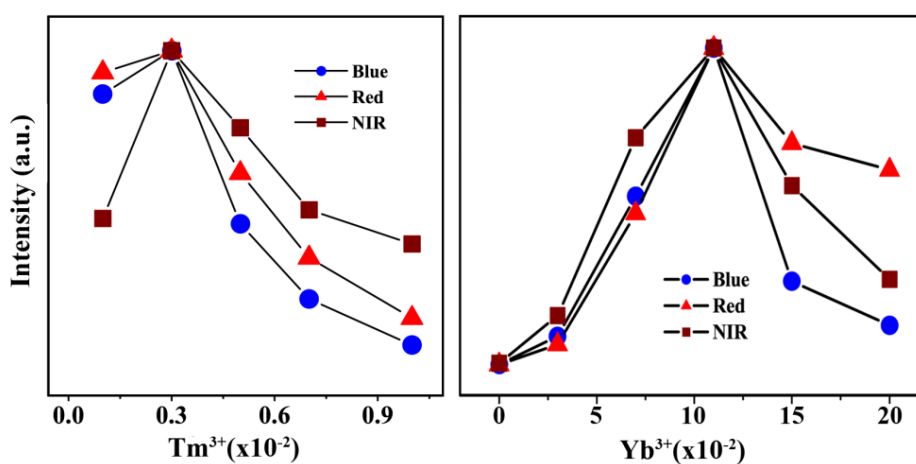

Fig.S1 Plot of integrated blue, red and NIR intensities as functions of Tm<sup>3+</sup> concentrations (10%Yb<sup>3+</sup>) and Yb<sup>3+</sup> concentrations (0.3%Tm<sup>3+</sup>)
